# Supplementary material
Source: PubMed Central journal article supplement (PMC3234496)
Supplement: mmc1.pdf [file mmc1.pdf]

| Monobody 7c12/Abl1<br>SH2 domain complex            |                                               |
|-----------------------------------------------------|-----------------------------------------------|
| <b>Data collection</b>                              |                                               |
| Space group                                         | P2 <sub>1</sub> 2 <sub>1</sub> 2 <sub>1</sub> |
| Cell dimensions                                     |                                               |
| <i>a</i> , <i>b</i> , <i>c</i> (Å)                  | 39.34, 49.40, 107.35                          |
| α, β, γ (°)                                         | 90, 90, 90                                    |
| Resolution (Å)                                      | 2.10 (2.18-2.10)                              |
| <i>R</i> <sub>sym</sub>                             | 13.3 (55.6)                                   |
| <i>I</i> / σ <i>I</i>                               | 11.8 (2.4)                                    |
| Completeness (%)                                    | 99.2 (99.3)                                   |
| Redundancy                                          | 5.2 (5.1)                                     |
| <b>Refinement</b>                                   |                                               |
| Resolution (Å)                                      | 2.10                                          |
| No. reflections                                     | 11957                                         |
| <i>R</i> <sub>work</sub> / <i>R</i> <sub>free</sub> | 0.19/0.25                                     |
| No. atoms                                           | 1726                                          |
| Protein                                             | 1581                                          |
| Ligand/ion                                          | 29                                            |
| Water                                               | 127                                           |
| <i>B</i> -factors                                   |                                               |
| Protein                                             | 23.27                                         |
| Ligand/ion                                          | 54.82                                         |
| Water                                               | 35.85                                         |
| R.m.s. deviations                                   |                                               |
| Bond lengths (Å)                                    | 0.013                                         |
| Bond angles (°)                                     | 1.378                                         |

**Table S1. Data collection and refinement statistics (molecular replacement) for Monobody 7c12/Abl SH2 domain complex structure, related to Figure 6**

| Sample No. | Origin | Age | Gender | WBC (x 10 <sup>3</sup> ) | Phase of Disease | BCR/ABL BM % | BCR/ABL PB % | Ph+ Metaphases % | Best response to Imatinib/Nilotinib |
|------------|--------|-----|--------|--------------------------|------------------|--------------|--------------|------------------|-------------------------------------|
| 51         | PB     | 64  | m      | 273.6                    | AP               | 65.907       | 66.907       | 100              | IM-resistant + NI-resistant         |
| 60         | BM     | 87  | f      | 230                      | AP               | 83.53        | 80.674       | 64               | IM-resistant                        |
| 61         | BM     | 32  | m      | 142.1                    | CP               | 63.388       | 53.965       | 100              | CCyR, MMR                           |
| 88         | BM     | 46  | f      | 184.5                    | CP               | 45.037       | 43.177       | 100              | CCyR, MMR                           |
| 111        | BM     | 33  | m      | 190                      | CP               | 38.866       | 26.735       | 100              | IM-resistant                        |
| 112        | BM     | 74  | m      | 47.1                     | CP               | 22.897       | 23.01        | 83               | CHR                                 |
| 113        | PB     | 74  | m      | 47.1                     | CP               | 22.897       | 23.01        | 83               | CHR                                 |

**Table S2. Clinical characteristics of primary CML samples used in this study, related to Figure 7**

Abbreviations used: PB, peripheral blood; BM, bone marrow; WBC, white blood cells; AP, accelerated phase; CP, chronic phase; IM, Imatinib; NI, Nilotinib; CCyR, Complete Cytogenetic Response; MMR, Major Molecular Response; CHR, Complete Hematologic Response.
